# Supplementary material for: Giant piezoresistive gauge factor in vein-membrane/graphene sensors with a wide linear working range
Source: Royal Society of Chemistry journal article supplement (doi:10.1039/d0tc02930k), 2020-01-01
Supplement: d0tc02930k1.pdf [file d0tc02930k1.pdf]

Supporting Information

## **Giant Piezoresistive Gauge Factor in Vein-membrane/Graphene Sensors with a Wide Linear Working Range**

*Zongheng Li<sup>a</sup>, Huiming Ning<sup>a,b,\*</sup>, Ning Hu<sup>c,d,\*</sup>, Yuanqing Li<sup>a</sup>, Long Qiao<sup>a</sup>*

<sup>a</sup>College of Aerospace Engineering, Chongqing University, Chongqing 400044, People's Republic of China

<sup>b</sup>State Key Laboratory of Advanced Design and Manufacturing for Vehicle Body, Changsha 410044, People's Republic of China

<sup>c</sup>State Key Laboratory of Reliability and Intelligence Electrical Equipment, Hebei University of Technology, Tianjin, 300401, People's Republic of China

<sup>d</sup>School of Mechanical Engineering, Hebei University of Technology, Tianjin 300401, People's Republic of China

Corresponding author: Ning Hu; Huiming Ning

E-mails: ninghu@hebut.edu.cn (or ninghu@cqu.edu.cn); ninghuiming@cqu.edu.cn

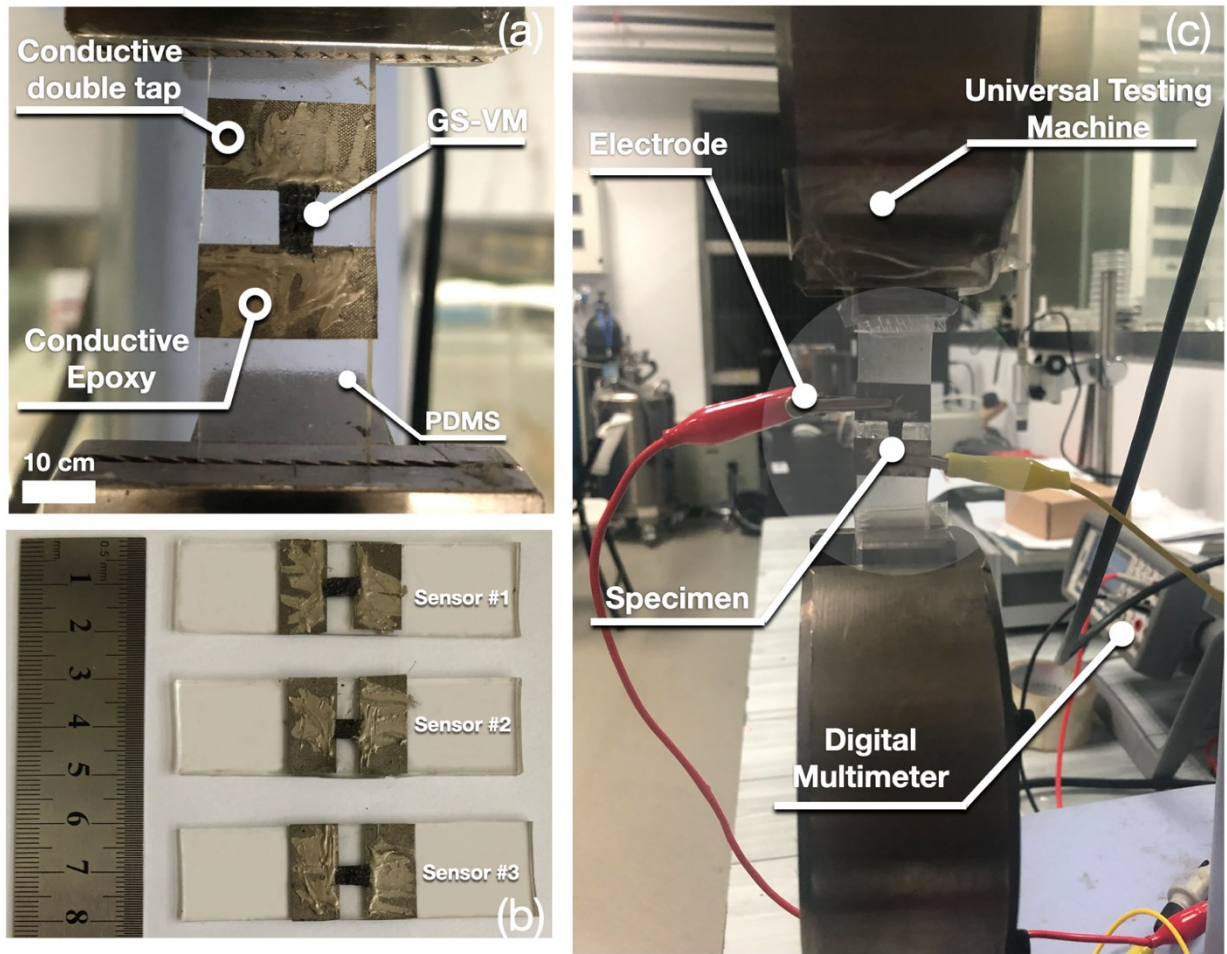

**Figure S1.** (a) and (b) GS-VM piezoresistive sensors; (c) testing method of the specimen.

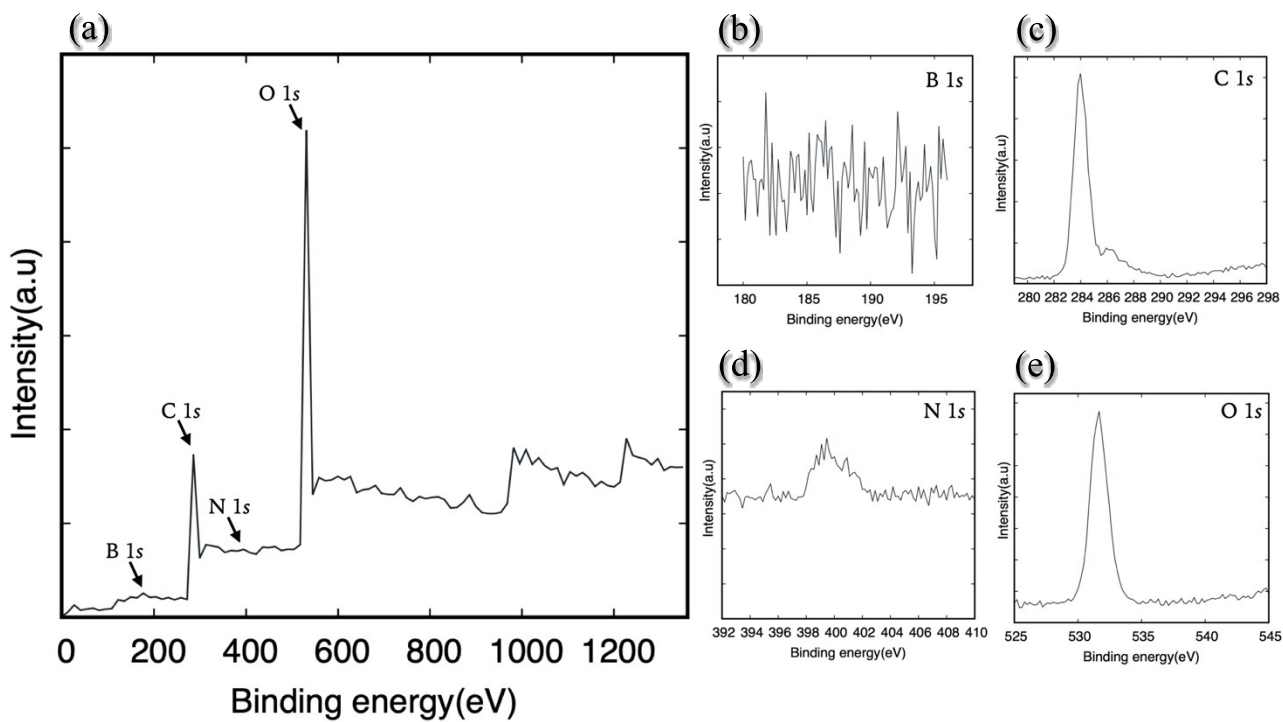

**Figure 2s.** (a-e) XPS of the vein of the dead leaf presents the overall analysis, B 1s, C 1s, N 1s, and O 1s, respectively.

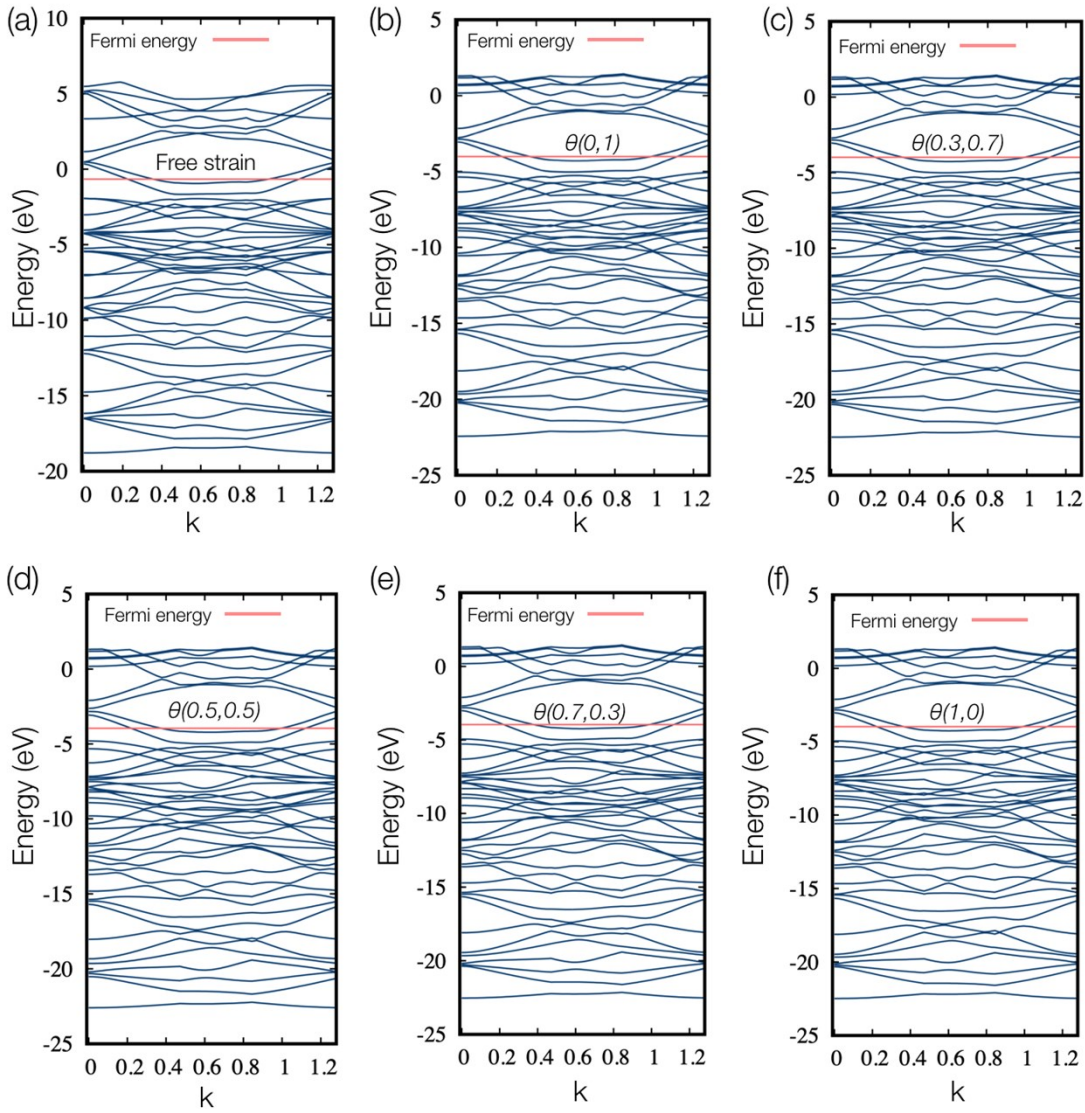

**Figure S3.** The electronic energy band; (a) the energy band in the strain-free state; (b-f) the energy band when subjected to 1% mechanical strain along different  $\theta$ -directions.

## Appendix A

To qualitatively estimate the equivalent resistance of GS-VM, we assumed that the number of resistors at every level, i.e.,  $s[L(k)]$ , mainly depended on the fractal feature at each level.  $k$  (1,2,3, ...,  $n-1$ ,  $n$ , ...) represents a certain level of the GS-VM, and  $s[L(k)]$  is the number of resistors. Therefore, the equivalent resistance of a certain level can be expressed by Equation (A.1) due to the self-similar nature of fractals [1].

$$\frac{1}{R_{L(k)}} = \frac{s[L(k)]}{\lambda^k R_{L(0)}}$$

(A.1)

Thus, the total equivalent resistance of GS-VM can be expressed by Equation (A.2).

$$R = \sum_{k=0}^{\infty} \frac{\lambda^k}{s[L(k)]} R_{L(0)} \quad (\text{A.2})$$

where  $\lambda$  represents the scalar of this fractal structure,  $\lambda \in (0,1)$ , and the resistance of the first top-level is  $R_{L(0)}$ . If we assume that  $s[L(k)] = k$ , then the total equivalent resistance of the GS-VM can be computed in Equation (A.3) when  $k$  goes to infinity.

$$R = R_{L(0)} \log_{10} \left( \frac{1}{1-\lambda} \right)$$

(A.3)

Equation (A.3) implies if the number of levels in the multi-level network goes to infinity, then the total resistance can be converged. This means that the GS-VM would not change its total equivalent resistance with a more complex fractal structure, but it will improve its ability to experience large deformations. Therefore, the GS-VM shows satisfactory repeatability.

## Appendix B

The well-known relation is presented in Equation (B.1), where  $R$ ,  $l$ ,  $S$ , and  $\rho$  denote the resistance, length, crossing-area, and resistivity, respectively.

$$R = \frac{l}{S} \rho \quad (\text{B.1})$$

Hence, GF is defined as:

$$GF = \frac{1R - R_0}{\varepsilon R_0}$$

(B.2)

Here, the subscript 0 represents the strain-free state, and  $\varepsilon$  is the applied strain. If the geometric parameters are ignored, substituting Equation (B.1) into Equation (B.2), Equation (B.2) can be expressed as:

$$GF = \frac{1}{\varepsilon} \left( \frac{\rho}{\rho_0} - 1 \right) \quad (\text{B.3})$$

However, the carriers, i.e., electrons and holes, play an important role in conductivity (reciprocal resistivity). Hence, the conductivity can be expressed as:

$$\sigma = nq\mu_e + pq\mu_h \quad (\text{B.4})$$

where  $\mu_e$  and  $\mu_h$  are the electron and hole mobilities, respectively, and  $q$  is the elementary electrical charge.

$$\mu_e = \frac{q\tau_e}{m_e^*} \quad (\text{B.5a})$$

and

$$\mu_h = \frac{q\tau_h}{m_h^*} \quad (\text{B.5b})$$

where  $m^*$  is the effective mass,  $\tau$  is the relaxation time, and the subscripts  $e$  and  $h$  represent electrons in the conduction band and holes in the valence band, respectively. Furthermore,

$$\frac{1}{m^*} = \frac{1}{\hbar^2} \frac{\partial^2 \epsilon}{\partial k \partial k} \quad (\text{B.6})$$

where  $\hbar$  is Planck's constant, and  $\mathbf{k}$  is the wavenumber vector. In Equation (B.4),  $n$  and  $p$  represent the concentrations of electrons and holes, respectively. The concentrations of electrons can be calculated by:

$$n = \int_{\epsilon_c}^{\infty} D_e(\epsilon) f(\epsilon) d\epsilon \quad (\text{B.7})$$

and

$$p = \int_{-\infty}^{\epsilon_v} D_h(\epsilon) [1 - f(\epsilon)] d\epsilon \quad (\text{B.8})$$

where  $f(\epsilon)$  is the Fermi-Dirac distribution, which is given by:

$$f(\epsilon) = \frac{1}{\exp[(\epsilon - \epsilon_F)/k_B T] + 1} \quad (\text{B.9})$$

where  $D(\epsilon)$ ,  $\epsilon$ ,  $\epsilon_F$ ,  $k_B$ , and  $T$  represent the density of states, the energy of the electronic band, Fermi energy, Boltzmann's constant, and temperature, respectively. Equations (B.4)-(B.9) were introduced by Kittel [2]. Therefore, the electrical conductivity can be summarized as:

$$\sigma = \frac{q^2 \tau_e}{\hbar^2} \int_{\epsilon_c}^{\infty} \frac{\partial^2 \epsilon}{\partial k \partial k} D_e(\epsilon) \frac{1}{\exp\left[\frac{\epsilon - \epsilon_F}{k_B T}\right] + 1} d\epsilon + \frac{q^2 \tau_h}{\hbar^2} \int_{-\infty}^{\epsilon_v} \frac{\partial^2 \epsilon}{\partial k \partial k} D_h(\epsilon) \left[1 - \frac{1}{\exp\left[\frac{\epsilon - \epsilon_F}{k_B T}\right] + 1}\right] d\epsilon \quad (\text{B.10})$$

The subscripts  $c$  and  $v$  represent the conduction and valence bands, respectively. First, all relaxation times were considered to be constant to conveniently use Gamil's idea [3]. The right sides of Equations (B.6)-(B.8) were then discretized to obtain:

$$\frac{1}{m^*} = \frac{1}{\hbar^2} \frac{\epsilon(k + 2\Delta k) + \epsilon(k) - 2\epsilon(k + \Delta k)}{\Delta k^2} \quad (\text{B.11})$$

$$n_i = \frac{1}{A} \sum_{k_i=j+1}^{\infty} w_{k_i} f[\epsilon(k_i)] \quad (\text{B.12})$$

$$p_i = \frac{1}{A} \sum_{k_i=0}^j w_{k_i} (1 - f[\epsilon(k_i)]) \quad (\text{B.13})$$

where index  $i$  represents the number of sub-bands in the electronic energy band structure, and  $j$  is the number of the valence band.  $A$  is the area of the boron-doped graphene supercell.  $w_{k_i}$ , calculated by Newton-Cotes integration<sup>[4]</sup>, is the weight coefficient of  $k$ . Here  $k$  represents the wavenumber along the stretch direction. Combining Equation (B.3) and Equations (B.11)-(B.13), the GF at the atomic scale can, therefore, be given in Equation (3).

### Appendix C

The stretch direction can be defined by Equation (C.1), where  $u$  and  $v$  represent the vector coordinates of stretching in the Cartesian system.

$$\theta(u,v) = \text{atan}\left(\frac{u}{v}\right) \quad (\text{C.1})$$

$\mathbf{a}$  and  $\mathbf{b}$  can be expressed by Equations (C.2a)-(C.2b) in the  $\mathbf{g}$ -system.

$$\mathbf{a} = a^i \mathbf{g}_i \quad (\text{C.2a})$$

$$\mathbf{b} = b^i \mathbf{g}_i \quad (\text{C.2b})$$

However,

$$\mathbf{g}_j = F \mathbf{e}_j \quad (\text{C.3})$$

where  $F$  can be calculated by Equation (C.4) according to the crystal structure of the supercell.



$$F = v_0 \sin\left(\frac{\pi}{6}\right) \begin{bmatrix} \frac{\cos(\theta)}{\sin\left(\frac{\pi}{3} + \theta\right)} & \frac{\sin(\theta)}{\sin\left(\frac{\pi}{3} + \theta\right)} \\ \frac{\sin(\theta)}{\sin\left(\frac{5\pi}{6} - \theta\right)} & \frac{\cos(\theta)}{\sin\left(\frac{5\pi}{6} - \theta\right)} \end{bmatrix} \quad (C.4)$$

Hence,

$$\begin{cases} g_1 = v_0 \sin\left(\frac{\pi}{6}\right) \left[ \frac{\cos(\theta)}{\sin\left(\frac{\pi}{3} + \theta\right)} e_1 + \frac{\sin(\theta)}{\sin\left(\frac{\pi}{3} + \theta\right)} e_2 \right] \\ g_2 = v_0 \sin\left(\frac{\pi}{6}\right) \left[ -\frac{\sin(\theta)}{\sin\left(\frac{5\pi}{6} - \theta\right)} e_1 + \frac{\cos(\theta)}{\sin\left(\frac{5\pi}{6} - \theta\right)} e_2 \right] \end{cases} \quad (C.5a)$$

$$F^{-1} = \frac{1}{v_0 \sin\left(\frac{\pi}{6}\right)} \begin{bmatrix} \cos(\theta) \sin\left(\frac{\pi}{3} + \theta\right) & -\sin(\theta) \sin\left(\frac{5\pi}{6} - \theta\right) \\ \sin(\theta) \sin\left(\frac{\pi}{3} + \theta\right) & \cos(\theta) \sin\left(\frac{5\pi}{6} - \theta\right) \end{bmatrix} \quad (C.5b)$$

In Equations (C.5a)-(C.5b),  $v_0$  can be easily calculated via the crystal structure parameters in the strain-free state.

For convenience,

$$B = F^{-1} \quad (C.6)$$

Hence,

$$a = CBa_0 \quad (C.7a)$$

$$b = CBb_0 \quad (C.7b)$$

$C$  can be represented by Equation (C.8a), while  $a_0$  and  $b_0$  are the crystal structure parameters in the Cartesian coordinate system, which can be calculated by Equations (C.8b)-(C.8c).

$$C = \begin{bmatrix} 1 + \frac{\varepsilon}{2} & 0 \\ 0 & 1 - \frac{\varepsilon\nu}{2} \end{bmatrix} \quad (C.8a)$$

$$a_0 = \left( \frac{\sqrt{3}}{3}v_0, -v_0 \right) \quad (C.8b)$$

$$b_0 = \left( \frac{\sqrt{3}}{3}v_0, v_0 \right) \quad (C.8c)$$

In Equation (C.8a),  $\varepsilon$  and  $\nu$  are applied strain and Poisson's ratio, respectively.  $\nu$  was equal to 0.14 and 0.28 when the crystal structure underwent stretching along the zigzag- and armchair-directions, respectively [3]. In this paper,  $\nu$  was calculated using linear interpolation when stretched in the zigzag- and armchair-directions in Equation (C.9)

$$\nu = 0.14u + 0.28v \quad (C.9)$$

Moreover,

$$G_{ij} = g_i \cdot g_j \quad (C.10a)$$

where  $G_{ij}$  represents the components of the metric tensor, whose matrix form can be obtained using Equation (C.10b):

$$G = [v_0 \sin\left(\frac{\pi}{6}\right)]^2 \begin{bmatrix} 1 & 0 \\ \sin^2\left(\frac{\pi}{3} + \theta\right) & 1 \\ 0 & \sin^2\left(\frac{5\pi}{6} - \theta\right) \end{bmatrix} \quad (C.10b)$$

Combining Equations (C.6)-(C.10b) and then substituting them into Equations (4a)-(4b), then the supercell parameters listed in Table 2 can be calculated.

## Reference

- [1] Kirillov, A. A, *A Tale of Two Fractals* **2013**, Springer Science & Business Media.
- [2] Kittel, C., *Introduction to solid state physics* **2005**, John Wiley & Sons. Inc., New York.
- [3] Gamil, M.; Nakamura, K.; El-Bab, A. M. F.; Tabata, O.; El-Moneim, A. A., Simulation of graphene piezoresistivity based on density functional calculations. *Modeling and Numerical Simulation of Material Science* **2013**, 3(04), 117
- [4] Stoer, J.; Bulirsch, R., *Introduction to numerical analysis* **2013**, (Vol. 12), Springer Science & Business Media.
